# Supplementary material for: AR12 increases BAG3 expression which is essential for Tau and APP degradation via LC3-associated phagocytosis and macroautophagy
Source: publisher site journal article supplement (doi:10.18632/aging.204337), 2022-10-13
Supplement: Supplementary file [file aging-v14i20-204337-supplementary-material-SD1.pdf]

**SUPPLEMENTARY FIGURES**

**RAW Mφ**

|      | +/+           |                 |       |       |       |               |               |      | -/-           |                 |       |       |       |               |               |      |
|------|---------------|-----------------|-------|-------|-------|---------------|---------------|------|---------------|-----------------|-------|-------|-------|---------------|---------------|------|
|      | GRP78 (total) | GRP78 (surface) | HSP70 | HSP90 | HSP27 | eIF2α (total) | eIF2α (P-S51) | ERK2 | GRP78 (total) | GRP78 (surface) | HSP70 | HSP90 | HSP27 | eIF2α (total) | eIF2α (P-S51) | ERK2 |
| VEH  | 100           | 100             | 100   | 100   | 100   | 100           | 100           | 100  | 100           | 100             | 100   | 100   | 100   | 100           | 100           | 100  |
| AR12 | 77*           | 80*             | 87*   | 78*   | 87*   | 100           | 115##         | 100  | 95            | 99              | 96    | 98    | 97    | 97            | 102           | 100  |
| NER  | 87*           | 84*             | 85*   | 87*   | 97    | 100           | 104###        | 100  | 96            | 99              | 99    | 99    | 99    | 100           | 100           | 100  |
| A+N  | 73**          | 73**            | 80*   | 65**  | 83*   | 100           | 127###        | 100  | 94            | 97              | 97    | 97    | 97    | 99            | 105           | 100  |

**Supplementary Figure 1. Deletion of Rubicon prevents the degradation of chaperones, Tau and APP in macrophages.** RAW macrophages (+/+ and -/- for Rubicon) were treated with vehicle control, AR12 (2 μM), neratinib (50 nM) or the drugs in combination for 6h. Cells were fixed in place and immunostaining performed to determine the expression of GRP78 (cell surface and total), HSP70, HSP90, HSP27, eIF2α and ERK2, and the phosphorylation of eIF2α S51. (n = 3 +/-SD) \* p < 0.05 less than vehicle control; \*\* p < 0.05 less than corresponding neratinib value; # p < 0.05 greater than vehicle control; ## p < 0.05 greater than corresponding AR12 value.

**A RAW Mφ**

|      | APP  |       |       |       | ERK2 |       |       |       | TAU |       |       |       | ERK2 |       |       |       |
|------|------|-------|-------|-------|------|-------|-------|-------|-----|-------|-------|-------|------|-------|-------|-------|
|      | CMV  | GRP78 | HSP70 | HSP90 | CMV  | GRP78 | HSP70 | HSP90 | CMV | GRP78 | HSP70 | HSP90 | CMV  | GRP78 | HSP70 | HSP90 |
| VEH  | 100  | 100   | 100   | 100   | 100  | 100   | 100   | 100   | 100 | 100   | 100   | 100   | 100  | 100   | 100   | 100   |
| AR12 | 86*  | 92    | 90    | 87*   | 100  | 100   | 100   | 100   | 71* | 87*†  | 85*†  | 84*†  | 100  | 100   | 100   | 100   |
| NER  | 89   | 100   | 94    | 91    | 100  | 100   | 100   | 100   | 80* | 92    | 87*   | 85*   | 100  | 99    | 100   | 100   |
| A+N  | 74** | 84*   | 84*   | 83*   | 100  | 100   | 100   | 99    | 68* | 85*†  | 84*†  | 81*†  | 100  | 100   | 100   | 100   |

  

**B RAW Mφ**

|      | APP   |         |         |         | ERK2  |         |         |         | TAU   |         |         |         | ERK2  |         |         |         |
|------|-------|---------|---------|---------|-------|---------|---------|---------|-------|---------|---------|---------|-------|---------|---------|---------|
|      | siSCR | siGRP78 | siHSP70 | siHSP90 | siSCR | siGRP78 | siHSP70 | siHSP90 | siSCR | siGRP78 | siHSP70 | siHSP90 | siSCR | siGRP78 | siHSP70 | siHSP90 |
| VEH  | 100   | 100     | 100     | 100     | 100   | 100     | 100     | 100     | 100   | 100     | 100     | 100     | 100   | 100     | 100     | 100     |
| AR12 | 88    | 76†     | 78*     | 81*     | 100   | 100     | 100     | 100     | 81*   | 67†     | 76*     | 73*     | 100   | 100     | 100     | 100     |
| NER  | 98    | 89      | 92      | 88      | 100   | 100     | 100     | 100     | 87*   | 72†     | 76†     | 74†     | 100   | 100     | 99      | 99      |
| A+N  | 77*   | 67†     | 73*     | 75*     | 100   | 100     | 100     | 100     | 71*   | 61†     | 70*     | 71*     | 100   | 100     | 99      | 99      |

**Supplementary Figure 2. GRP78 plays a key role in regulating Tau and APP expression after drug exposure in macrophages.** (A) RAW macrophages were transfected with an empty vector plasmid or with plasmids to express GRP78, HSP70 or HSP90, and in parallel co-transfected to express Tau or APP. After 24h, cells were treated with vehicle control, AR12 (2 μM), neratinib (50 nM) or the drugs in combination for 6h. Cells were fixed in place and immunostaining performed to determine the expression of Tau, APP and ERK2. (n = 3 +/-SD) \* p < 0.05 less than vehicle control; \*\* p < 0.05 less than corresponding AR12 value; † p < 0.05 greater than corresponding value in CMV transfected cells. (B) RAW macrophages were transfected to express APP or Tau and co-transfected with a scrambled siRNA or with an siRNA molecules to knock down the expression of GRP78, HSP70 or HSP90. After 24h, cells were treated with vehicle control, AR12 (2 μM), neratinib (50 nM) or the drugs in combination for 6h. Cells were fixed in place and immunostaining performed to determine the expression of Tau, APP and ERK2. (n = 3 +/-SD) \* p < 0.05 less than vehicle control; † p < 0.05 less than corresponding value in siSCR cells.
